# Supplementary material for: Bionic biphasic composite scaffolds with osteochondrogenic factors for regeneration of full-thickness osteochondral defects
Source: Royal Society of Chemistry journal article supplement (doi:10.1039/d2bm00103a), 2022-01-01
Supplement: d2bm00103a1.pdf [file d2bm00103a1.pdf]

## **Bionic Biphasic Composite Scaffold with Osteochondrogenic Factors for Regeneration of Full-Thickness Osteochondral Defect**

Yanbo Zhang <sup>a</sup>, Yu Han <sup>d</sup>, Yachen Peng <sup>a</sup>, Jie Lei <sup>c</sup>, Fei Chang <sup>b,\*</sup>

<sup>a</sup> Department of Orthopedics, China-Japan Union Hospital of Jilin University,  
Changchun, P. R. China

<sup>b</sup> Department of Orthopedics, The Second Hospital of Jilin University, Changchun, P.  
R. China

<sup>c</sup> Department of MR, Changchun FAW General Hospital, Changchun, P. R. China

<sup>d</sup> Department of Orthopedics, Jilin Central General Hospital, Jilin, P. R. China

\* Corresponding author:

*Email*            *adress:*            ccfei\_cn@hotmail.com            (F.            Chang)

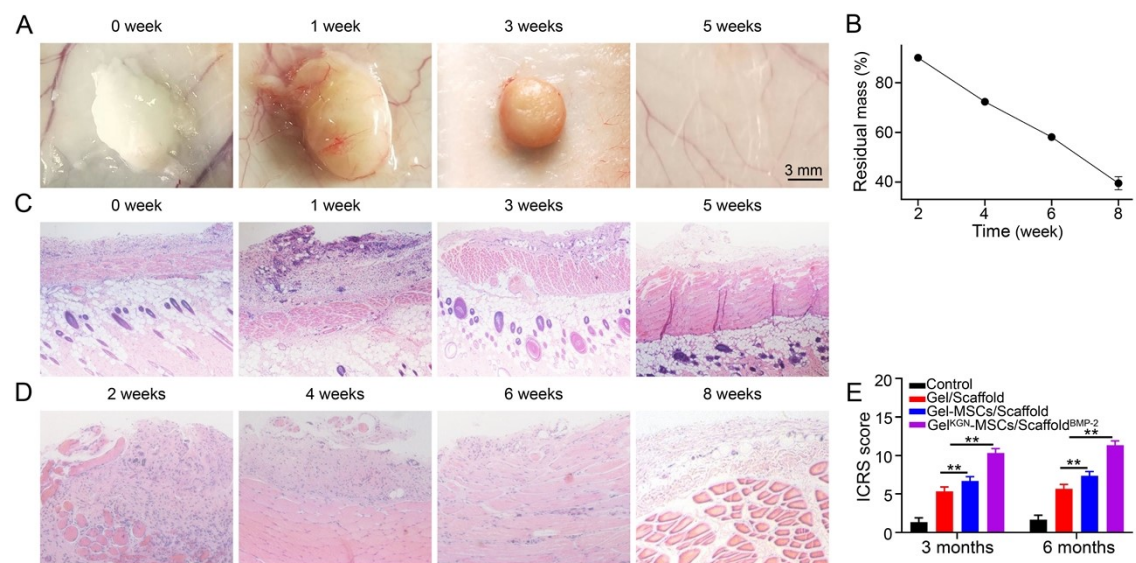

**Fig. S1.** In vivo degradation of mPEG-*b*-PLV thermogel **(A)** and PLGA/HA scaffold **(B)**. In vivo biocompatibility of mPEG-*b*-PLV thermogel **(C)** and PLGA/HA scaffold **(D)**. ICRS histological score **(E)**.

**Table S1. ICRS Macroscopic Evaluation of Neocartilage.**

| Cartilage repair assessment ICRS                                                    | Points |
|-------------------------------------------------------------------------------------|--------|
| <b>Degree of defect repair</b>                                                      |        |
| In level with surrounding cartilage                                                 | 4      |
| 75% repair of defect depth                                                          | 3      |
| 50% repair of defect depth                                                          | 2      |
| 25% repair of defect depth                                                          | 1      |
| 0% repair of defect depth                                                           | 0      |
| <b>Integration to border zone</b>                                                   |        |
| Complete integration with surrounding cartilage                                     | 4      |
| Demarcating border <1 mm                                                            | 3      |
| 3/4th of graft integrated, 1/4th with a notable border > 1 mm width                 | 2      |
| 1/2 of graft integrated with surrounding cartilage, 1/2 with a notable border >1 mm | 1      |
| From no contact to 1/4th of graft integrated with surrounding cartilage             | 0      |
| <b>Macroscopic appearance</b>                                                       |        |
| Intact smooth surface                                                               | 4      |
| Fibrillated surface                                                                 | 3      |
| Small, scattered fissures, or cracs                                                 | 2      |
| Several, small, or few but large fissures                                           | 1      |
| Total degeneration of grafted area                                                  | 0      |
| <b>Overall repair assessment</b>                                                    |        |
| Grade I: normal                                                                     | 12     |
| Grade II: nearly normal                                                             | 11–8   |
| Grade III: abnormal                                                                 | 7–4    |
| Grade IV: severely abnormal                                                         | 3–1    |

**Table S2. ICRS Histological Grading Scale for Cartilage Regeneration.**

| Description                                              | Points |
|----------------------------------------------------------|--------|
| <b>Cell morphology</b>                                   |        |
| Hyaline cartilage                                        | 0      |
| Mostly hyaline cartilage                                 | 1      |
| Mostly fibrocartilage                                    | 2      |
| Mostly non-cartilage                                     | 3      |
| Non-cartilage only                                       | 4      |
| <b>Matrix staining (metachromasia)</b>                   |        |
| Normal (compared with host adjacent cartilage)           | 0      |
| Slightly reduced                                         | 1      |
| Markedly reduced                                         | 2      |
| No metachromatic stain                                   | 3      |
| <b>Surface regularity</b>                                |        |
| Smooth (>3/4)                                            | 0      |
| Moderate (>1/2–3/4)                                      | 1      |
| Irregular (1/4–1/2)                                      | 2      |
| Severely irregular (<1/4)                                | 3      |
| <b>Thickness of cartilage</b>                            |        |
| >2/3                                                     | 0      |
| 1/3–2/3                                                  | 1      |
| <1/3                                                     | 2      |
| <b>Integration of donor with host adjacent cartilage</b> |        |
| Both edges integrated                                    | 0      |
| One edge integrated                                      | 1      |
| Neither edge integrated                                  | 2      |
| Maximum total                                            | 14     |

**Table S3. Sequences of Primers Used for Real-time PCR.**

| Gene   | Forward primer (5'–3') | Reverse primer (5'–3') |
|--------|------------------------|------------------------|
| COL2A1 | TCCTGTGCGACGACATAATTCT | CCTTTGGTCCTGGTTTCC     |
| FAM    | CCTCGTCATCTTTATCTTC    | CTGCGTTGTGCCTATCGT     |
| ACAN   | TCCACCATTTCGGCATAAC    | TACGGATTCTACCAAAGTTCTG |
| SOX9   | CTTCAACCTCCCGCACTAC    | TTGCCTTCAGCTTCAATGTC   |
| COL1A1 | CACGGACTTTGGAGATTTGT   | CACTCGGGTCTTCAAGCA     |
| ALPL   | AGGCTTCTTCCTGCTGGTG    | GGGTTTCTTGTCCGTGTCG    |
| SPP1   | GCTAAACCCTGACCCATCT    | CGTCGGATTCATTGGAGT     |
| SPARC  | AAACCGAAGAGGAAGTAGTGG  | TTGTGGCAAAGAAGTGGC     |
